# Supplementary material for: Activated mast cells promote differentiation of B cells into effector cells
Source: PubMed Central journal article supplement (PMC4742803; doi:10.1038/srep20531), 2016-02-05
Supplement: srep20531-s1.pdf [file srep20531-s1.pdf]

***Supplementary information***

**Activated mast cells promote differentiation of B cells into effector cells**

Anna-Karin E. Palm<sup>1</sup>, Gianni Garcia Faroldi<sup>2</sup>, Marcus Lundberg<sup>1</sup>, Gunnar Pejler<sup>3,2</sup>  
and Sandra Kleinau<sup>1\*</sup>

<sup>1</sup> Uppsala University, Department of Cell and Molecular Biology, Uppsala, Sweden

<sup>2</sup> Swedish University of Agricultural Sciences, Department of Anatomy, Physiology  
and Biochemistry, Uppsala, Sweden

<sup>3</sup> Uppsala University, Department of Medical Biochemistry and Microbiology,  
Uppsala, Sweden

**Supplementary Table S1.** Quantification of the cytokine array presented in Fig. 2a. Values are mean expression intensity  $\pm$  standard deviation of duplicates for every spot on the cytokine array, as quantified using the ImageJ software. Mediators indicated in bold represent those that are profoundly up-regulated in co-cultures of MCs and B cells vs. their expression in cultures of MCs or B cells alone.

| Mediator          | Naïve BCs                        | BCR-act. BCs                     | Act. MCs                        | BCR-act. BCs +<br>act. MCs       |
|-------------------|----------------------------------|----------------------------------|---------------------------------|----------------------------------|
| AXL               | 2.38 $\pm$ 0.69                  | 3.10 $\pm$ 0.68                  | 1.35 $\pm$ 0.65                 | 2.49 $\pm$ 0.07                  |
| BLC               | 14.10 $\pm$ 1.36                 | 14.83 $\pm$ 1.69                 | 8.85 $\pm$ 0.89                 | 14.42 $\pm$ 3.03                 |
| CD30L             | 3.62 $\pm$ 0.48                  | 9.85 $\pm$ 0.05                  | 1.63 $\pm$ 0.74                 | 6.00 $\pm$ 0.10                  |
| CD30              | 3.02 $\pm$ 0.49                  | 4.67 $\pm$ 1.48                  | 2.10 $\pm$ 0.36                 | 3.89 $\pm$ 0.92                  |
| CD40              | 0.81 $\pm$ 0.03                  | 1.69 $\pm$ 0.42                  | 0.45 $\pm$ 0.09                 | 2.00 $\pm$ 1.09                  |
| CRG-2             | 0.87 $\pm$ 0.42                  | 6.84 $\pm$ 0.39                  | 1.03 $\pm$ 0.06                 | 6.70 $\pm$ 2.12                  |
| CTACK             | 6.49 $\pm$ 0.77                  | 10.06 $\pm$ 1.96                 | 6.47 $\pm$ 1.05                 | 13.54 $\pm$ 6.96                 |
| <b>CXCL16</b>     | <b>2.34<math>\pm</math>0.61</b>  | <b>6.13<math>\pm</math>1.09</b>  | <b>3.18<math>\pm</math>0.48</b> | <b>12.79<math>\pm</math>0.28</b> |
| Eotaxin           | 5.10 $\pm$ 0.28                  | 8.69 $\pm$ 0.86                  | 4.45 $\pm$ 0.23                 | 5.69 $\pm$ 1.64                  |
| Eotaxin-2         | 100.68 $\pm$ 1.45                | 100.61 $\pm$ 0.12                | 117.39 $\pm$ 5.44               | 121.79 $\pm$ 9.19                |
| Fas Ligand        | 33.41 $\pm$ 7.60                 | 39.93 $\pm$ 1.11                 | 33.42 $\pm$ 0.63                | 40.15 $\pm$ 6.04                 |
| Fractalkine       | 4.46 $\pm$ 0.56                  | 4.78 $\pm$ 0.68                  | 6.29 $\pm$ 3.32                 | 6.36 $\pm$ 2.67                  |
| G-CSF             | 2.46 $\pm$ 0.16                  | 3.22 $\pm$ 0.46                  | 2.15 $\pm$ 0.64                 | 4.59 $\pm$ 2.05                  |
| GM-CSF            | 1.82 $\pm$ 0.86                  | 1.93 $\pm$ 0.54                  | 29.48 $\pm$ 8.24                | 25.87 $\pm$ 0.01                 |
| IFN $\gamma$      | 1.34 $\pm$ 0.23                  | 4.65 $\pm$ 0.27                  | 1.72 $\pm$ 0.54                 | 4.49 $\pm$ 0.45                  |
| IGFBP-3           | 15.13 $\pm$ 1.45                 | 17.38 $\pm$ 0.47                 | 10.89 $\pm$ 0.52                | 17.77 $\pm$ 5.26                 |
| IGFBP-5           | 12.34 $\pm$ 2.87                 | 15.51 $\pm$ 0.66                 | 11.21 $\pm$ 0.60                | 20.85 $\pm$ 0.39                 |
| IGFBP-6           | 2.90 $\pm$ 0.01                  | 3.79 $\pm$ 0.15                  | 1.52 $\pm$ 0.10                 | 3.29 $\pm$ 0.57                  |
| IL-1 $\alpha$     | 24.56 $\pm$ 2.16                 | 35.38 $\pm$ 0.62                 | 22.19 $\pm$ 2.69                | 34.32 $\pm$ 0.80                 |
| IL-1 $\beta$      | 3.61 $\pm$ 0.30                  | 6.12 $\pm$ 0.60                  | 2.95 $\pm$ 0.00                 | 11.86 $\pm$ 3.98                 |
| IL-2              | 2.80 $\pm$ 0.38                  | 35.11 $\pm$ 0.40                 | 3.44 $\pm$ 0.09                 | 34.71 $\pm$ 5.80                 |
| IL-3              | 1.55 $\pm$ 0.00                  | 5.44 $\pm$ 0.38                  | 35.58 $\pm$ 1.44                | 37.20 $\pm$ 5.20                 |
| IL-3 $\beta$      | 6.02 $\pm$ 0.23                  | 9.24 $\pm$ 0.71                  | 13.39 $\pm$ 1.15                | 20.77 $\pm$ 3.20                 |
| IL-4              | 12.68 $\pm$ 2.37                 | 12.29 $\pm$ 2.32                 | 11.41 $\pm$ 2.63                | 14.09 $\pm$ 3.39                 |
| IL-5              | 2.61 $\pm$ 0.40                  | 5.60 $\pm$ 0.29                  | 7.36 $\pm$ 0.32                 | 13.74 $\pm$ 1.65                 |
| IL-6              | 1.28 $\pm$ 0.09                  | 1.98 $\pm$ 0.52                  | 199.61 $\pm$ 3.81               | 210.45 $\pm$ 1.01                |
| IL-9              | 10.15 $\pm$ 1.52                 | 42.39 $\pm$ 3.87                 | 11.19 $\pm$ 0.32                | 38.95 $\pm$ 2.75                 |
| IL-10             | 5.25 $\pm$ 0.39                  | 6.84 $\pm$ 0.85                  | 0.81 $\pm$ 0.24                 | 6.26 $\pm$ 0.01                  |
| IL-12p40/p70      | 10.44 $\pm$ 0.93                 | 12.98 $\pm$ 3.31                 | 2.92 $\pm$ 1.20                 | 11.63 $\pm$ 0.30                 |
| IL-12p70          | 12.45 $\pm$ 0.45                 | 17.75 $\pm$ 4.01                 | 10.05 $\pm$ 0.54                | 15.68 $\pm$ 1.67                 |
| IL-13             | 3.64 $\pm$ 0.43                  | 7.22 $\pm$ 1.57                  | 8.25 $\pm$ 1.40                 | 12.24 $\pm$ 2.05                 |
| IL-17             | 0.40 $\pm$ 0.16                  | 1.43 $\pm$ 0.30                  | 0.19 $\pm$ 0.13                 | 0.56 $\pm$ 0.11                  |
| KC                | 2.60 $\pm$ 0.85                  | 4.04 $\pm$ 0.97                  | 1.26 $\pm$ 0.30                 | 3.98 $\pm$ 0.40                  |
| LeptinR           | 19.15 $\pm$ 1.67                 | 25.42 $\pm$ 4.66                 | 16.64 $\pm$ 2.42                | 24.57 $\pm$ 0.06                 |
| Leptin            | 9.31 $\pm$ 1.16                  | 17.77 $\pm$ 3.02                 | 7.34 $\pm$ 0.98                 | 23.15 $\pm$ 9.49                 |
| LIX               | 55.06 $\pm$ 4.28                 | 58.35 $\pm$ 9.12                 | 54.90 $\pm$ 6.43                | 64.59 $\pm$ 10.20                |
| <b>L-Selectin</b> | <b>17.03<math>\pm</math>2.78</b> | <b>20.10<math>\pm</math>6.94</b> | <b>8.54<math>\pm</math>2.75</b> | <b>52.03<math>\pm</math>1.76</b> |
| Lymphotactin      | 51.78 $\pm$ 1.19                 | 56.21 $\pm$ 0.97                 | 50.84 $\pm$ 7.60                | 58.33 $\pm$ 0.53                 |
| MCP1              | 23.42 $\pm$ 1.67                 | 29.18 $\pm$ 2.06                 | 87.62 $\pm$ 5.43                | 103.32 $\pm$ 2.95                |

|               |                   |                   |                   |                   |
|---------------|-------------------|-------------------|-------------------|-------------------|
| <b>MCP5</b>   | <b>12.68±1.37</b> | <b>19.02±2.59</b> | <b>15.28±0.12</b> | <b>36.22±2.98</b> |
| M-CSF         | 25.48±0.24        | 30.99±0.49        | 21.33±4.94        | 31.95±3.18        |
| MIG           | 32.20±0.16        | 31.71±1.64        | 26.78±0.29        | 34.32±0.42        |
| <b>MIP-1α</b> | <b>4.69±1.61</b>  | <b>15.11±0.67</b> | <b>21.14±1.03</b> | <b>41.33±2.43</b> |
| MIP-1γ        | 24.56±1.54        | 54.13±3.90        | 128.16±1.38       | 162.76±5.50       |
| MIP-2         | 34.51±1.53        | 42.37±2.45        | 37.38±1.25        | 48.62±1.28        |
| MIP-3β        | 45.78±0.67        | 54.03±1.92        | 43.64±0.92        | 53.59±3.89        |
| MIP-3α        | 9.39±0.80         | 15.63±2.55        | 6.57±0.18         | 13.00±0.01        |
| PF-4          | 21.91±1.95        | 25.70±1.03        | 16.20±1.50        | 20.34±6.06        |
| P-Selectin    | 29.39±0.61        | 35.17±2.37        | 26.17±1.39        | 32.22±6.82        |
| RANTES        | 13.46±0.77        | 15.64±1.90        | 13.27±4.49        | 22.92±13.29       |
| SCF           | 4.46±1.25         | 6.45±0.16         | 3.37±0.81         | 15.39±6.81        |
| SDF-1         | 62.06±1.15        | 65.68±0.93        | 49.38±4.17        | 59.15±5.88        |
| TARC          | 6.47±0.73         | 17.78±1.58        | 4.83±0.24         | 16.02±2.65        |
| TCA-3         | 22.74±0.19        | 127.42±0.59       | 80.09±5.16        | 143.16±2.97       |
| TECK          | 3.92±0.42         | 11.03±1.59        | 2.03±0.84         | 13.38±0.78        |
| TIMP-1        | 14.93±1.93        | 20.07±1.24        | 9.11±2.62         | 23.87±0.35        |
| TNFα          | 4.14±0.01         | 5.73±1.21         | 1.65±0.03         | 5.36±0.67         |
| sTNFR1        | 2.35±0.39         | 3.79±0.06         | 2.91±0.55         | 11.38±1.10        |
| sTNFR2        | 7.89±0.21         | 11.92±2.99        | 6.15±0.26         | 24.85±0.37        |
| TPO           | 32.63±1.95        | 71.60±4.41        | 27.21±0.34        | 56.34±4.04        |
| VCAM-1        | 6.20±0.20         | 10.10±1.46        | 1.03±0.35         | 19.44±10.51       |
| VEGF          | 10.33±1.78        | 17.73±4.47        | 8.58±1.61         | 23.46±6.34        |

### Supplementary figure S1

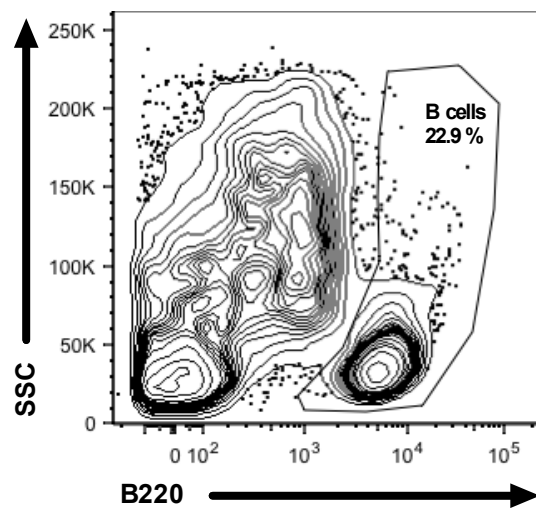

**Supplementary Figure S1. Gating strategy for B cells.** Cells from the MC:B cell cocultures were stained for surface markers and the viability dye 7-AAD and analyzed by flow cytometry. B cells were defined as 7-AAD<sup>-</sup> B220<sup>high</sup>. SSC = side scatter

## Supplementary figure S2

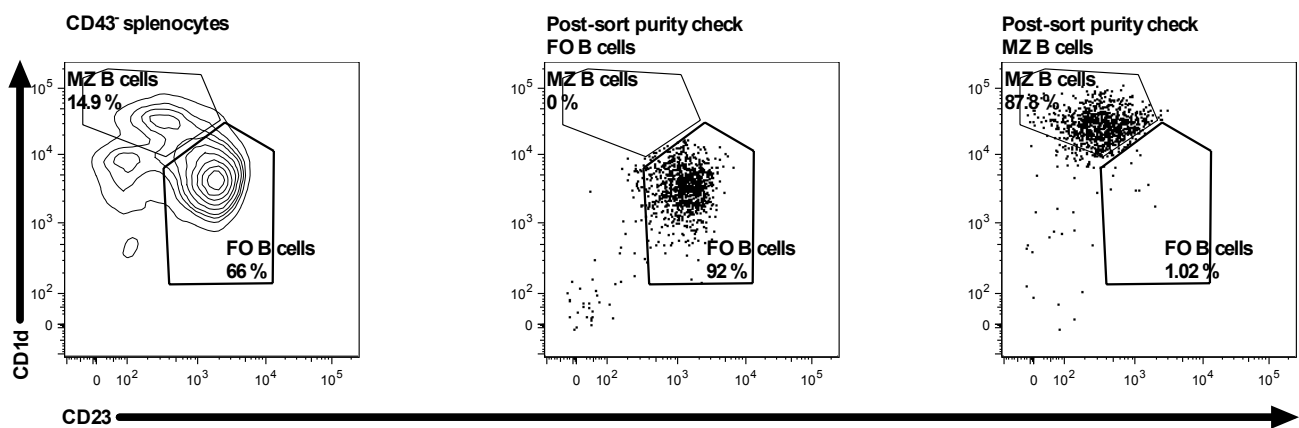

**Supplementary Figure S2. Sorting strategy for MZ and FO B cells.** Splenocytes were first enriched for B cells using MACS, and subsequently stained for CD1d and CD23 and sorted into marginal zone (MZ) and follicular (FO) B cells using FACS. MZ B cells were defined as CD1d<sup>high</sup> CD23<sup>low</sup> and FO B cells as CD1d<sup>low</sup> CD23<sup>high</sup> (left). Sorting purities were routinely around 90% for both FO B cells (middle) and MZ B cells (right). FO B cells, follicular B cells; MZ B cells, marginal zone B cells.

### Supplementary figure S3

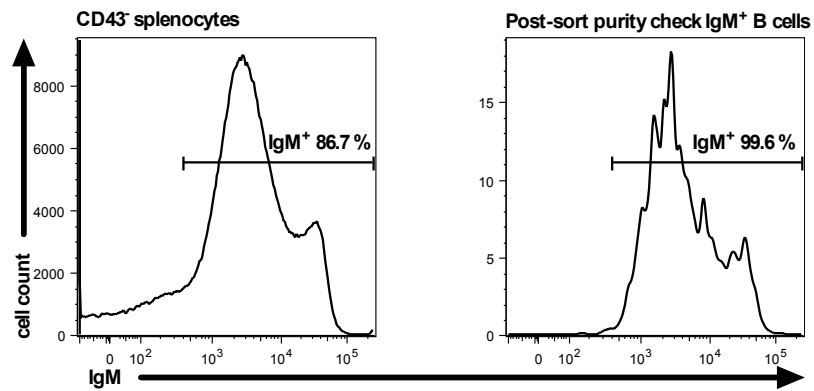

**Supplementary Figure S3. Sorting strategy for IgM<sup>+</sup> B cells.** Splenocytes were first enriched for B cells using MACS, and subsequently stained for IgM. The IgM<sup>+</sup> fraction was routinely sorted with a purity of >98%.

## Supplementary figure S4

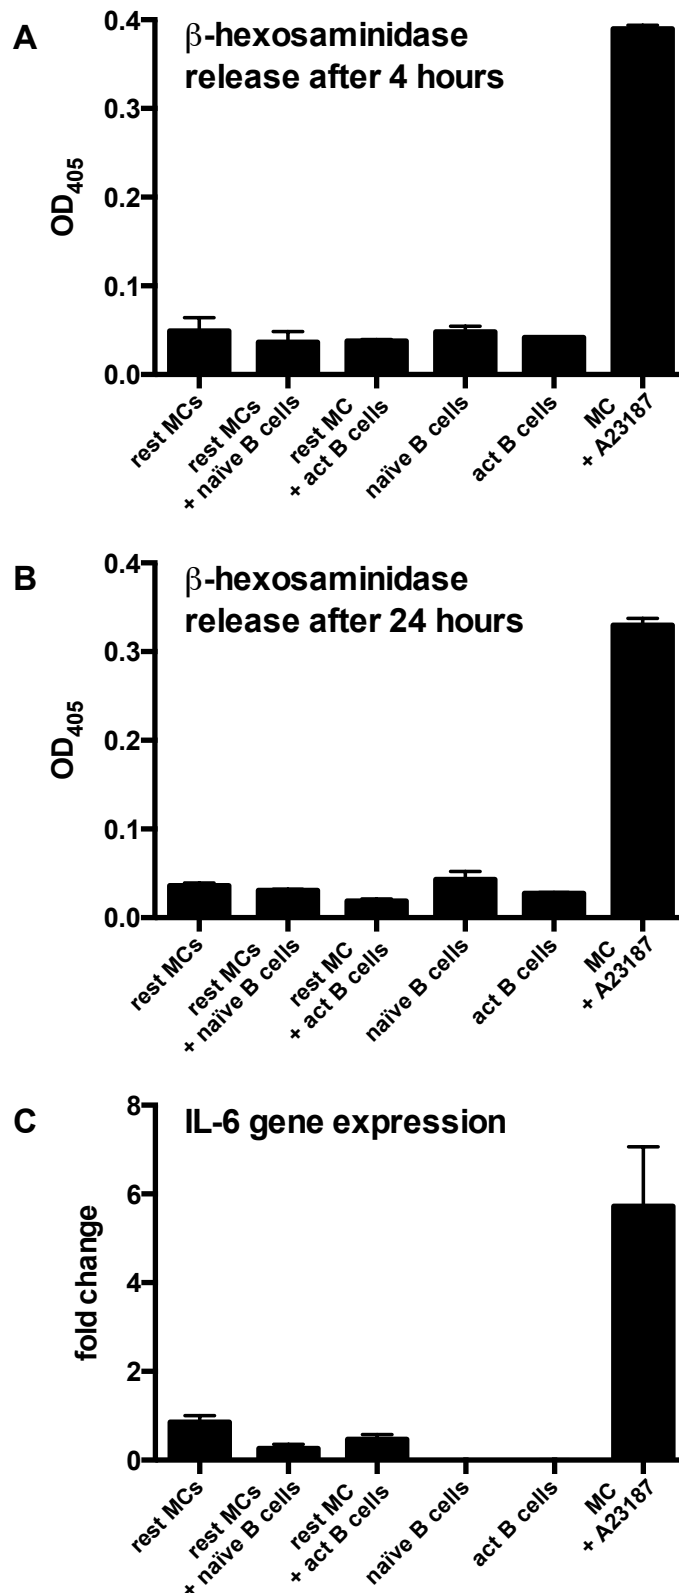

**Supplementary Figure S4. Coculture of MCs and B cells does not provoke MC activation.** Non-activated MCs (rest MCs) were cocultured with naïve or BCR-activated B cells (act B cells) and MC activation was monitored as the release of  $\beta$ -hexosaminidase (A, 4 hours incubation; and B, 24 hours incubation) and the expression of the IL-6 gene as determined by real time quantitative RT-PCR (C, 4 hours incubation). As negative controls, rest MCs, naïve or act B cells were cultured alone. As positive control for MC activation, MCs were incubated with 1  $\mu$ M calcium ionophore A23187. Note that stimulation of MCs by calcium ionophore produces a robust  $\beta$ -hexosaminidase release and profound IL-6 gene upregulation, whereas coculture of MCs with B cells does not result in MC activation. Results are expressed as mean + SEM and represent 2 independent experiments in duplicates. MC, mast cell; BCR, B cell receptor
